# Supplementary material for: Size-Dependent High-Pressure Behavior of Pure and Eu3+-Doped Y2O3 Nanoparticles: Insights from Experimental and Theoretical Investigations
Source: MDPI journal article supplement (doi:10.3390/nano14080721), 2024-04-20
Supplement: s1 [file s1]

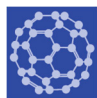

Supplementary Material of

# Size-Dependent High-Pressure Behavior of Pure and Eu<sup>3+</sup>-Doped Y<sub>2</sub>O<sub>3</sub> Nanoparticles: Insights from Experimental and Theoretical Investigations

André Luis de Jesus Pereira <sup>1,2,\*</sup>, Juan Ángel Sans <sup>1</sup>, Óscar Gomis <sup>3</sup>, David Santamaría-Pérez <sup>4</sup>, Sudeshna Ray <sup>5</sup>, Armstrong Godoy, Jr. <sup>2</sup>, Argemiro Soares da Silva-Sobrinho <sup>2</sup>, Plácida Rodríguez-Hernández <sup>6</sup>, Alfonso Muñoz <sup>6</sup>, Catalin Popescu <sup>7</sup> and Francisco Javier Manjón <sup>1,\*</sup>

<sup>1</sup> Instituto de Diseño para la Fabricación y Producción Automatizada, MALTA Consolider Team, Universitat Politècnica de València, 46022 València, Spain; juasant2@upvnet.upv.es

<sup>2</sup> Laboratório de Plasmas e Processos—LPP, Instituto Tecnológico de Aeronáutica—ITA, São José dos Campos 12228-900, Brazil; godoyajr@gmail.com (A.G.J.); argemirosss@gmail.com (A.S.d.S.-S.)

<sup>3</sup> Centro de Tecnologías Físicas, MALTA Consolider Team, Universitat Politècnica de València, 46022 València, Spain; osgohi@fis.upv.es

<sup>4</sup> Departament de Física Aplicada-ICMUV, MALTA Consolider Team, Universitat de Valencia, 46100 Burjassot, Spain; david.santamaria@uv.es

<sup>5</sup> Department of Chemistry, Rabindranath Tagore University, Bhopal 464993, Madhya Pradesh, India; sudeshnaskype@gmail.com

<sup>6</sup> Departamento de Física, Instituto de Materiales y Nanotecnología, MALTA Consolider Team, Universidad de La Laguna, 38207 San Cristóbal de La Laguna, Spain; plrguez@ull.edu.es (P.R.-H.); amunoz@ull.edu.es (A.M.)

<sup>7</sup> ALBA-CELLS, MALTA Consolider Team, 08290 Cerdanyola del Valles (Barcelona), Catalonia, Spain; cpopescu@cells.es

\* Correspondence: andreljp@ita.br (A.L.d.J.P.); fmanjon@fis.upv.es (F.J.M.)

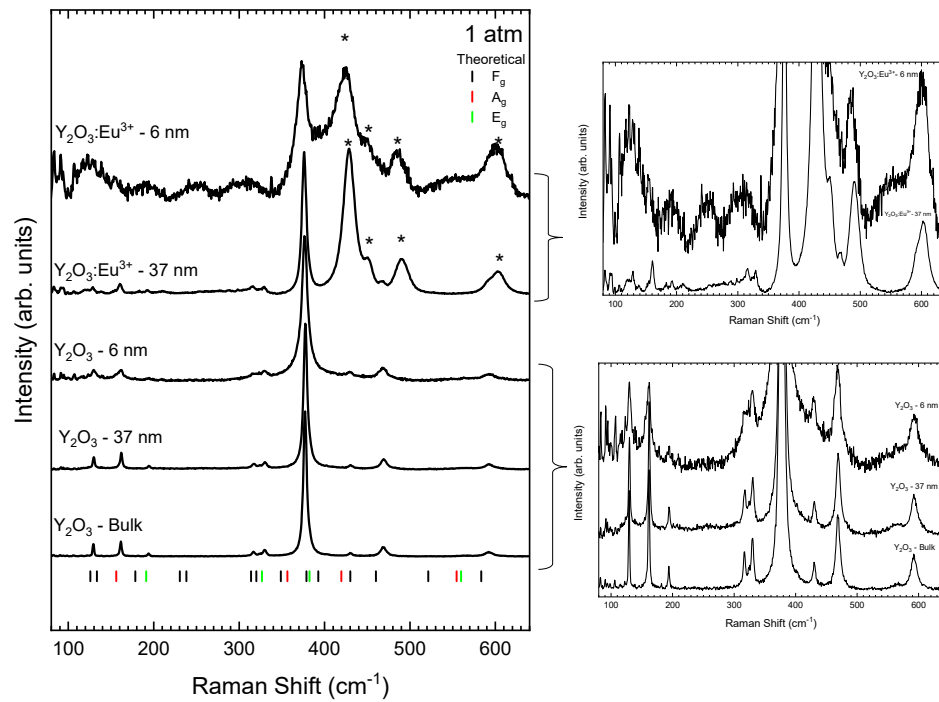

**Figure S1.** RS measurements of bulk  $\text{Y}_2\text{O}_3$  and pure and  $\text{Eu}^{3+}$ -doped  $\text{Y}_2\text{O}_3$  nanocrystals at ambient pressure (outside the DAC). Peaks marked with \* are related to the luminescence of  $\text{Eu}^{3+}$  ions in the  $\text{Y}_2\text{O}_3$  lattice.

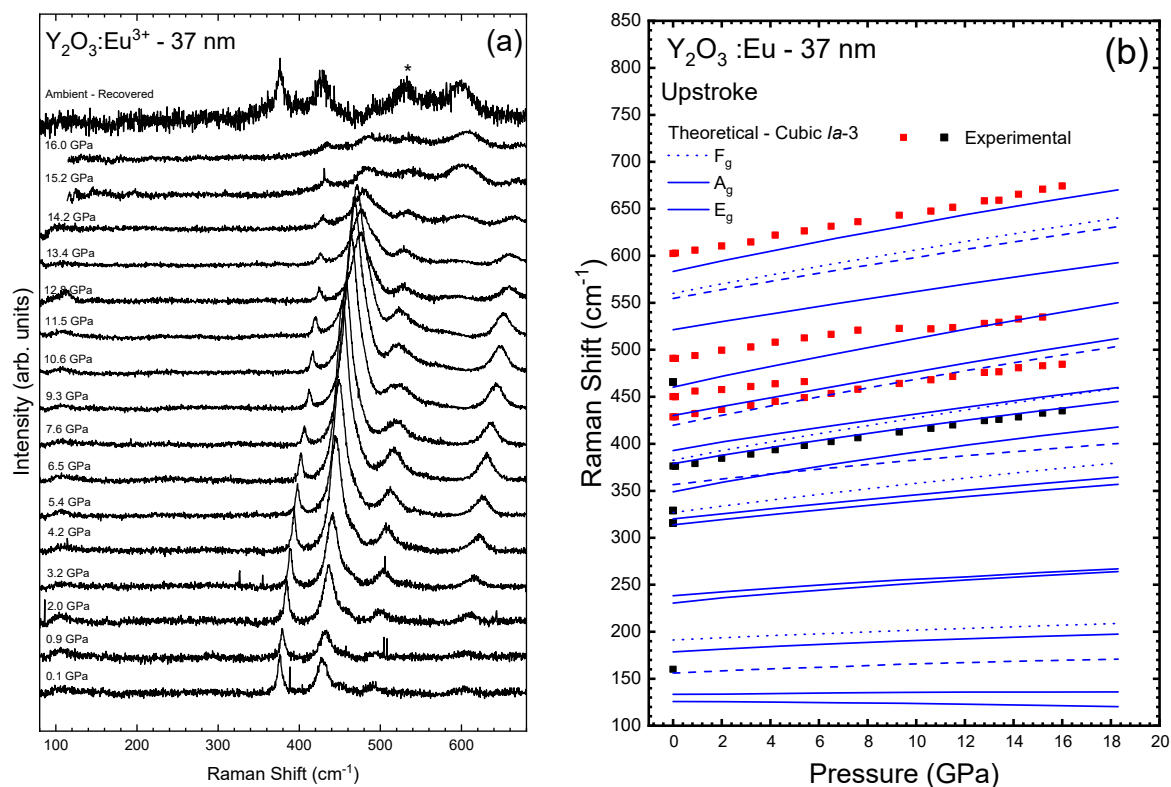

**Figure S2.** (a) Room-temperature Raman spectra of  $\text{Y}_2\text{O}_3:\text{Eu}^{3+}$ -37nm at selected pressures on upstroke. The upper spectrum is related to the recovered sample after decompression and the \* indicates a peak unrelated to the initial phase. (b) Pressure dependence of the experimental (symbols) Raman-active frequencies of  $\text{Y}_2\text{O}_3:\text{Eu}^{3+}$ -37nm on upstroke. Blue lines represent the theoretical Raman-active frequencies of bulk C-type  $\text{Y}_2\text{O}_3$ . Red symbols represent peaks related to the  $\text{Eu}^{3+}$  luminescence.

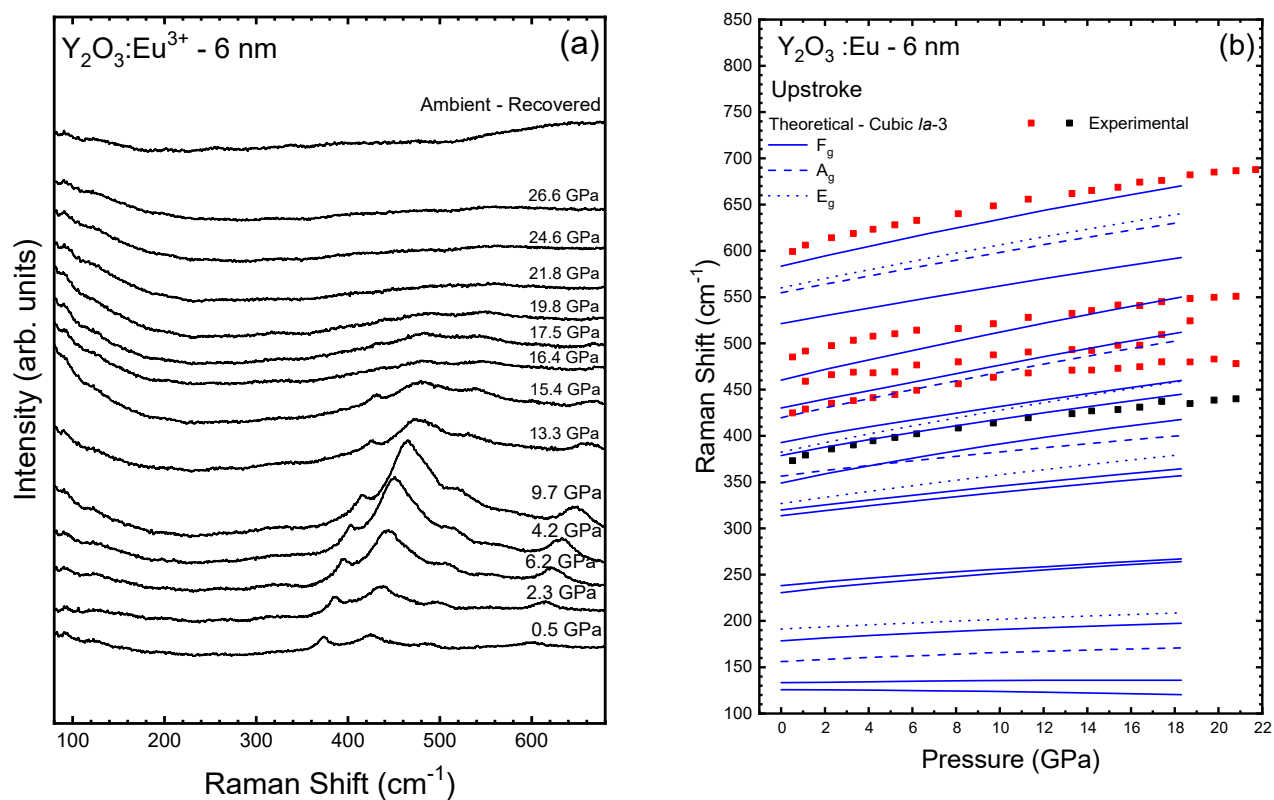

**Figure S3.** (a) Room-temperature Raman spectra of  $\text{Y}_2\text{O}_3:\text{Eu}^{3+}$ -6nm at selected pressures on upstroke. The upper spectrum is related to the recovered sample after decompression. (b) Pressure dependence of the experimental (symbols) Raman-active frequencies of  $\text{Y}_2\text{O}_3:\text{Eu}^{3+}$ -6nm on upstroke. Blue lines represent the theoretical Raman-active frequencies of bulk C-type  $\text{Y}_2\text{O}_3$ . Red symbols represent peaks related to the  $\text{Eu}^{3+}$  luminescence.

1.
